# Supplementary material for: Atrial High-Rate Episodes Detected by Cardiac Implantable Electronic Devices: Dynamic Changes in Episodes and Predictors of Incident Atrial Fibrillation
Source: MDPI journal article supplement (doi:10.3390/biology11030443), 2022-03-15
Supplement: s1 [file s1]

# **Atrial High-Rate Episodes detected by Cardiac Implantable Electronic Devices: Dynamic changes in episodes and predictors of incident atrial fibrillation**

Jacopo Francesco Imberti<sup>1,2,3</sup>, Niccolò Bonini<sup>1</sup>, Alberto Tosetti<sup>1</sup>, Davide A. Mei<sup>1</sup>, Luigi Gerra<sup>1</sup>, Vincenzo Livio Malavasi<sup>1</sup>, Andrea Mazza<sup>4</sup>, Gregory Y. H. Lip<sup>3</sup>, Giuseppe Boriani<sup>1\*</sup>

<sup>1</sup>Cardiology Division, Department of Biomedical, Metabolic and Neural Sciences, University of Modena and Reggio Emilia, Policlinico di Modena, Modena, Italy.

<sup>2</sup>Clinical and Experimental Medicine PhD Program, University of Modena and Reggio Emilia, Modena, Italy

<sup>3</sup>Liverpool Centre for Cardiovascular Science, University of Liverpool and Liverpool Heart & Chest Hospital, Liverpool, United Kingdom

<sup>4</sup> Cardiology Division, S. Maria della Stella Hospital, Orvieto, Italy.

---

**Supplemental Table S1.** Implanted CIEDs characteristics.

**Supplemental Table S2.** Univariate and multivariate Cox's regression analysis for clinical atrial fibrillation.

**Supplemental Table S3.** Univariate Cox's regression analysis for single AHRE episode  $\geq 24$ h in duration.

|                                                             | <b>N (%)</b><br>(n=104) |
|-------------------------------------------------------------|-------------------------|
| Age at implant (years)*                                     | 75.6 (70.6-80.5)        |
| CIED implant to enrollment (years)*                         | 2.2 (1.2-5.0)           |
| CIED type                                                   |                         |
| PM                                                          | 82 (78.8)               |
| ICD                                                         | 6 (5.8)                 |
| CRT-P/D                                                     | 16 (15.4)               |
| Implant reason                                              |                         |
| Sick sinus syndrome                                         | 29 (27.9)               |
| Atrioventricular block                                      | 54 (51.9)               |
| Primary prevention and/or cardiac resynchronization therapy | 21 (20.2)               |
| Manufacturer                                                |                         |
| Medtronic                                                   | 59 (56.7)               |
| St. Jude Medical                                            | 3 (2.9)                 |
| Boston Scientific                                           | 28 (26.9)               |
| Sorin                                                       | 9 (8.7)                 |
| Biotronik                                                   | 5 (4.8)                 |
| Pacing mode at implant                                      |                         |
| DDD                                                         | 76 (73.1)               |
| VVI                                                         | 2 (1.9)                 |
| AAI                                                         | 11 (10.6)               |
| VDD                                                         | 15 (14.4)               |

**Supplemental Table S1.** Implanted CIED characteristics. CRT-P/D, cardiac resynchronization therapy and pacing/defibrillator; ICD, implantable cardioverter defibrillator; PM, pacemaker.

\*Median (interquartile range)

|                                        | Univariate |         |            | Multivariate |         |            |
|----------------------------------------|------------|---------|------------|--------------|---------|------------|
|                                        | HR         | p-value | CI         | HR           | p-value | CI         |
| Age                                    | 1.01       | 0.71    | 0.96-1.06  |              |         |            |
| Age ≥ 80 years                         | 1.30       | 0.54    | 0.55-3.07  |              |         |            |
| Female sex                             | 0.85       | 0.72    | 0.34-2.10  |              |         |            |
| CHA <sub>2</sub> DS <sub>2</sub> -VASc | 1.38       | 0.04    | 1.02-1.87  | 1.45         | 0.02    | 1.06-2.00  |
| CKD                                    | 1.24       | 0.64    | 0.50-3.08  |              |         |            |
| Pacing mode at implant                 |            |         |            |              |         |            |
| DDD                                    |            | Ref.    |            |              |         |            |
| VVI                                    | 1.96       | 0.52    | 0.25-15.11 |              |         |            |
| AAI                                    | 0.70       | 0.73    | 0.09-5.37  |              |         |            |
| VDD                                    | 1.01       | 0.99    | 0.33-3.06  |              |         |            |
| Total IAB                              | 1.53       | 0.57    | 0.35-6.67  |              |         |            |
| Longest AHRE episode at enrollment     |            |         |            |              |         |            |
| 5-59min                                |            | Ref.    |            |              | Ref.    |            |
| 1h-11h59min                            | 1.74       | 0.27    | 0.65-4.65  | 1.34         | 0.56    | 0.50-3.60  |
| 12h-23h59min                           | 10.65      | <0.01   | 2.42-46.80 | 4.25         | 0.04    | 1.05-17.20 |

**Supplemental Table S2.** Univariate and multivariate Cox's regression analysis for clinical atrial fibrillation.

CI, Confidence interval; CKD, chronic kidney disease; HR, hazard ratio; IAB, interatrial block.

|                                        |              | Univariate |         |            |
|----------------------------------------|--------------|------------|---------|------------|
|                                        |              | HR         | p-value | CI         |
| Age                                    |              | 0.98       | 0.48    | 0.93-1.03  |
| Age ≥ 80 years                         |              | 0.62       | 0.36    | 0.23-1.71  |
| Female sex                             |              | 0.37       | 0.12    | 0.10-1.31  |
| CHA <sub>2</sub> DS <sub>2</sub> -VASc |              | 1.19       | 0.26    | 0.88-1.59  |
| CKD                                    |              | 0.81       | 0.69    | 0.29-2.27  |
| Pacing mode at implant                 |              |            |         |            |
|                                        | DDD          |            | Ref.    |            |
|                                        | VVI          | 0.00       | 0.99    | 0.00-      |
|                                        | AAI          | 1.41       | 0.57    | 0.31-6.35  |
|                                        | VDD          | 0.62       | 0.65    | 0.14-2.78  |
| Total IAB                              |              | 1.56       | 0.56    | 0.35-6.94  |
| Longest AHRE episode at enrollment     |              |            |         |            |
|                                        | 5-59min      |            | Ref.    |            |
|                                        | 1h-11h59min  | 1.53       | 0.45    | 0.51-4.60  |
|                                        | 12h-23h59min | 3.74       | 0.12    | 0.71-19.64 |

**Supplemental Table S3.** Univariate Cox regression analysis for single AHRE episode ≥ 24h in duration.

CI, confidence interval; CKD, chronic kidney disease; HR, hazard ratio; IAB, interatrial block.
